# Supplementary material for: Static stability predicts the continuum of interleg coordination patterns in Drosophila
Source: Oxford University Press journal article supplement (doi:10.1242/jeb.189142), 2018-01-01
Supplement: jeb189142supp.pdf [file jeb189142supp.pdf]

|                    | Fluid density,<br>kg/m <sup>3</sup> | Relative fluid<br>velocity, m s <sup>-1</sup> | Length<br>scale, m | Dynamic<br>viscosity,<br>Ns/m <sup>2</sup> | Re,<br>unitless |
|--------------------|-------------------------------------|-----------------------------------------------|--------------------|--------------------------------------------|-----------------|
| <b>Human/air</b>   | 1.225                               | 1                                             | 1                  | 18E-6                                      | ≈ 68E3          |
| <b>Fly/air</b>     | 1.225                               | 30E-3                                         | 2E-3               | 18E-6                                      | ≈ 4             |
| <b>Human/honey</b> | 1450                                | 30E-3                                         | 1                  | 14                                         | ≈ 3             |

**Table S1:** Reynolds numbers of different animals walking through different fluids. The viscosity of air to a fly walking at 30 mm s<sup>-1</sup> is like the viscosity of honey to a human walking at the same speed. In such a scenario, a person would not be able to make ballistic motions due to the damping from the viscous honey. By the same logic, walking in fruit flies is hardly a dynamic motion; instead, it is dominated by viscous forces from the air and elastic forces from its muscles.

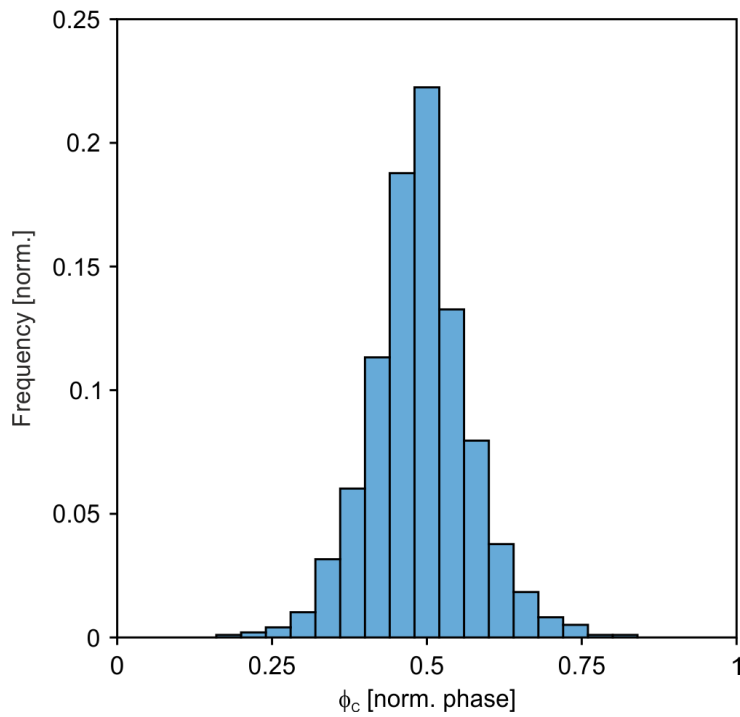

**Figure S1:** Distribution of contralateral phase relationships  $\phi_c$  at walking speeds below 5 BL  $s^{-1}$ . Instead of a bimodal distribution, whose peaks would be centered at around 1/3 and 2/3, contralateral phases at low and intermediate walking speeds cluster around 0.5. This indicates anti-phasic stepping in contralateral legs of the same segment. Idealized tetrapod coordination ( $\phi_c = 1/3$  or  $2/3$ ) is observed rarely.
